# Supplementary material for: Layered cobalt oxide epitaxial films exhibiting thermoelectric ZT = 0.11 at room temperature
Source: Royal Society of Chemistry journal article supplement (doi:10.1039/d0ta07565e), 2020-10-13
Supplement: d0ta07565e1.pdf [file d0ta07565e1.pdf]

## Electronic Supplementary Information

# Layered cobalt oxide epitaxial films exhibiting thermoelectric $ZT = 0.11$ at room temperature

Yugo Takashima,<sup>a</sup> Yu-qiao Zhang,<sup>\*b</sup> Jiake Wei,<sup>c,d</sup> Bin Feng,<sup>c</sup> Yuichi Ikuhara,<sup>c,d</sup> Hai Jun Cho,<sup>a,b</sup> and Hiromichi Ohta<sup>\*a,b</sup>

### Author affiliations

\* Corresponding authors

<sup>a</sup>Graduate School of Information Science and Technology, Hokkaido University,  
N14W9, Kita, Sapporo 060–0814, Japan

<sup>b</sup>Research Institute for Electronic Science, Hokkaido University, N20W10, Kita,  
Sapporo 001–0020, Japan

E-mail: yuqiaozhang0730@gmail.com

E-mail: hiromichi.ohta@es.hokudai.ac.jp

<sup>c</sup>Institute of Engineering Innovation, The University of Tokyo, 2–11–16 Yayoi, Bunkyo,  
Tokyo 113–8656, Japan

<sup>d</sup>Elements Strategy Initiative for Structural Materials, Kyoto University, Yoshida-  
honmachi, Sakyo-ku, Kyoto 606–8501, Japan

**Table S1.** Thermoelectric properties of the layered cobaltite epitaxial films in the in-plane direction at room temperature. In addition to the observed properties, we calculated the lattice thermal conductivity ( $\kappa_{\text{lattice}} = \kappa_{\text{obsd}} - \kappa_{\text{electron}}$ ). The electron thermal conductivity ( $\kappa_{\text{electron}}$ ) was estimated by assuming the Wiedemann-Franz law ( $\kappa_{\text{electron}} = L \cdot \sigma \cdot T$ , where the  $L$  is  $2.44 \times 10^{-8} \text{ W } \Omega \text{ K}^{-2}$ ).

|                                                                    | $\text{Ca}_{1/3}\text{CoO}_2$ <sup>19</sup> | $\text{Na}_{0.75}\text{CoO}_2$ | $\text{Sr}_{1/3}\text{CoO}_2$ <sup>21</sup> | $\text{Ba}_{0.27}\text{CoO}_2$ |
|--------------------------------------------------------------------|---------------------------------------------|--------------------------------|---------------------------------------------|--------------------------------|
| $\sigma_{\text{in}}$ (S cm <sup>-1</sup> )                         | 1330                                        | 1330                           | 890                                         | 2310                           |
| $S_{\text{in}}$ ( $\mu\text{V K}^{-1}$ )                           | +90                                         | +96                            | +115                                        | +72                            |
| $\text{PF}_{\text{in}}$ (mW m <sup>-1</sup> K <sup>-2</sup> )      | 1.08                                        | 1.23                           | 1.18                                        | 1.20                           |
| $\kappa_{\text{in obsd}}$ (W m <sup>-1</sup> K <sup>-1</sup> )     | 6.79                                        | 5.46                           | 4.51                                        | 3.29                           |
| $\kappa_{\text{in electron}}$ (W m <sup>-1</sup> K <sup>-1</sup> ) | 0.98                                        | 0.97                           | 0.65                                        | 1.69                           |
| $\kappa_{\text{in lattice}}$ (W m <sup>-1</sup> K <sup>-1</sup> )  | 5.81                                        | 4.49                           | 3.86                                        | 1.60                           |
| $ZT_{\text{in}}$                                                   | 0.048                                       | 0.067                          | 0.078                                       | 0.11                           |

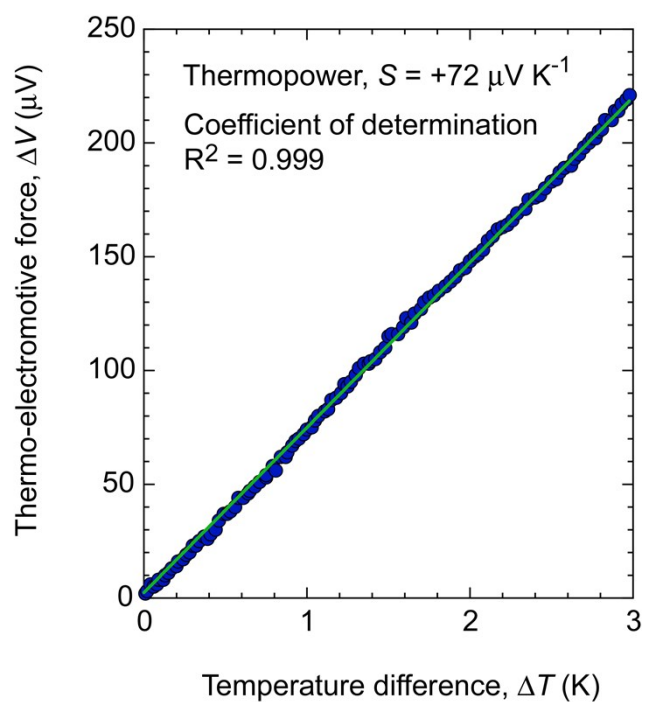

**Figure S1.** Typical thermo-electromotive force ( $\Delta V$ ) vs. temperature difference ( $\Delta T$ ) plot of the resultant  $\text{Ba}_{0.27}\text{CoO}_2$  epitaxial film at room temperature. The thermopower ( $S$ ) was calculated to be  $+72 \mu\text{V K}^{-1}$  as the linear slope of the  $\Delta T - \Delta V$  plot. The coefficient of determination ( $R^2$ ) was 0.999.

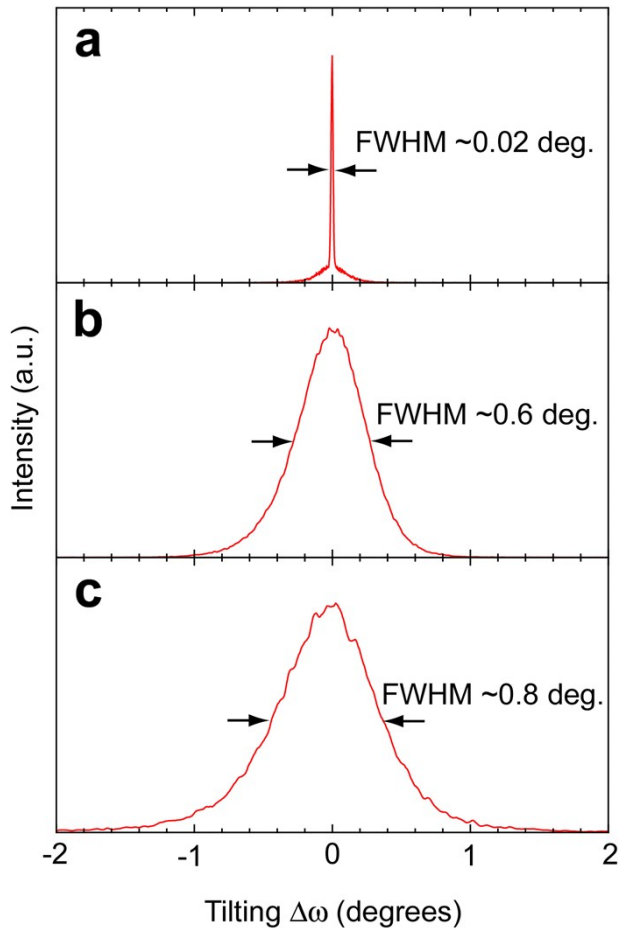

**Figure S2.** Average crystal tilting of the resultant films in the out-of-plane direction. Out-of-plane X-ray rocking curves of (a) 111 CoO after step 1, (b) 0002  $\text{Na}_{0.75}\text{CoO}_2$  after step 2, and (c) 0002  $\text{Ba}_{1/3}\text{CoO}_2$  after step 3. The full-width at half maximum (FWHM) values are (a)  $\sim 0.02^\circ$ , (b)  $\sim 0.6^\circ$  and (c)  $\sim 0.8^\circ$ , respectively. Since the topographic AFM images of these films [Figs. 3(d)–(f)] show grain growth tendency, the increasing tendency of the FWHM values reflects the warp of the films, not mosaicity.

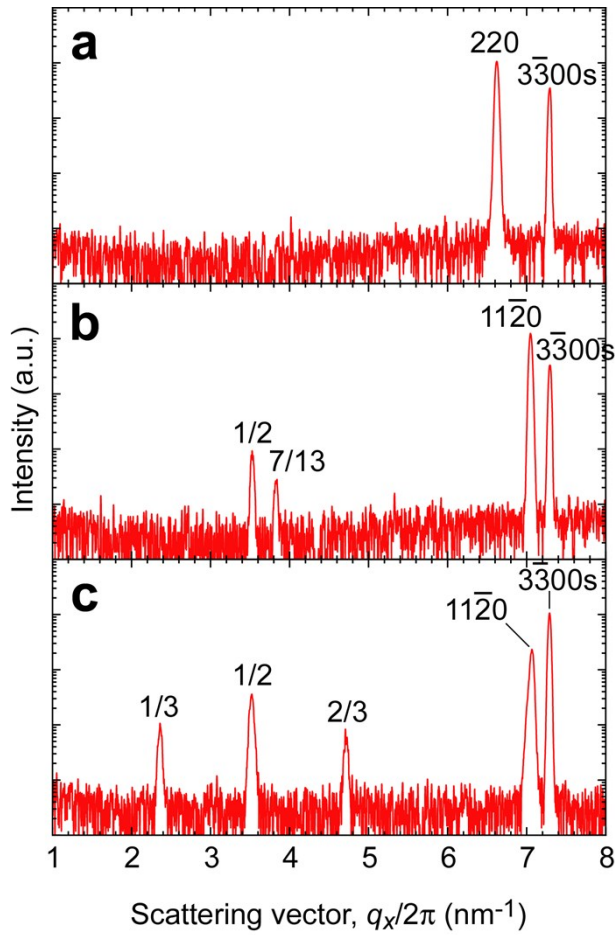

**Figure S3.** Change in the in-plane XRD pattern of the resultant films on  $(0001)$   $\alpha\text{-Al}_2\text{O}_3$  substrate. (a) After step 1 (CoO), (b) after step 2 ( $\text{Na}_{0.75}\text{CoO}_2$ ), and (c) after step 3 ( $\text{Ba}_{1/3}\text{CoO}_2$ ). The epitaxial relationship of (a) is  $(111)[110]$  CoO  $\parallel$   $(0001)[1-100]$   $\alpha\text{-Al}_2\text{O}_3$ , (b) is  $(0001)[1-120]$   $\text{Na}_{0.75}\text{CoO}_2$   $\parallel$   $(0001)[1-100]$   $\alpha\text{-Al}_2\text{O}_3$ , and (c) is  $(0001)[1-120]$   $\text{Ba}_{1/3}\text{CoO}_2$   $\parallel$   $(0001)[1-100]$   $\alpha\text{-Al}_2\text{O}_3$ , respectively. Several diffraction peaks due to sublattices of Na ( $1/2$  and  $7/13$ ) and Ba ( $1/3$ ,  $1/2$ , and  $2/3$ ) are clearly seen in (b) and (c).

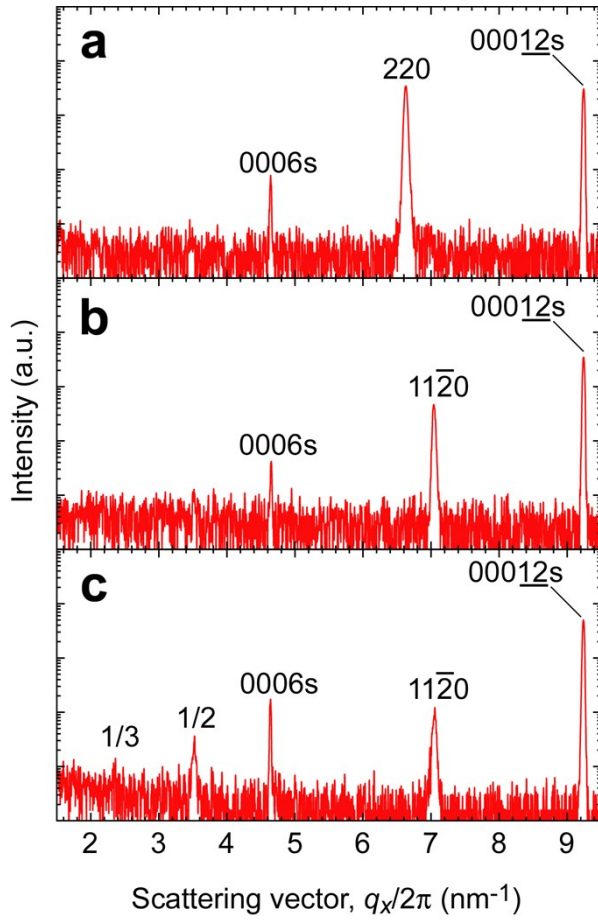

**Figure S4.** Change in the in-plane XRD pattern of the resultant films on (1-100)  $\alpha$ - $\text{Al}_2\text{O}_3$  substrate. (a) After step 1 (CoO), (b) after step 2 ( $\text{Na}_{0.75}\text{CoO}_2$ ), and (c) after step 3 ( $\text{Ba}_{1/3}\text{CoO}_2$ ). The epitaxial relationship of (a) is  $[110]$  CoO  $\parallel$   $[0001]$   $\alpha$ - $\text{Al}_2\text{O}_3$ , (b) is  $[1-120]$   $\text{Na}_{0.75}\text{CoO}_2$   $\parallel$   $[0001]$   $\alpha$ - $\text{Al}_2\text{O}_3$ , and (c) is  $[1-120]$   $\text{Ba}_{1/3}\text{CoO}_2$   $\parallel$   $[0001]$   $\alpha$ - $\text{Al}_2\text{O}_3$ , respectively. Several diffraction peaks due to sublattices of Ba (1/3 and 1/2) are clearly seen in (c).

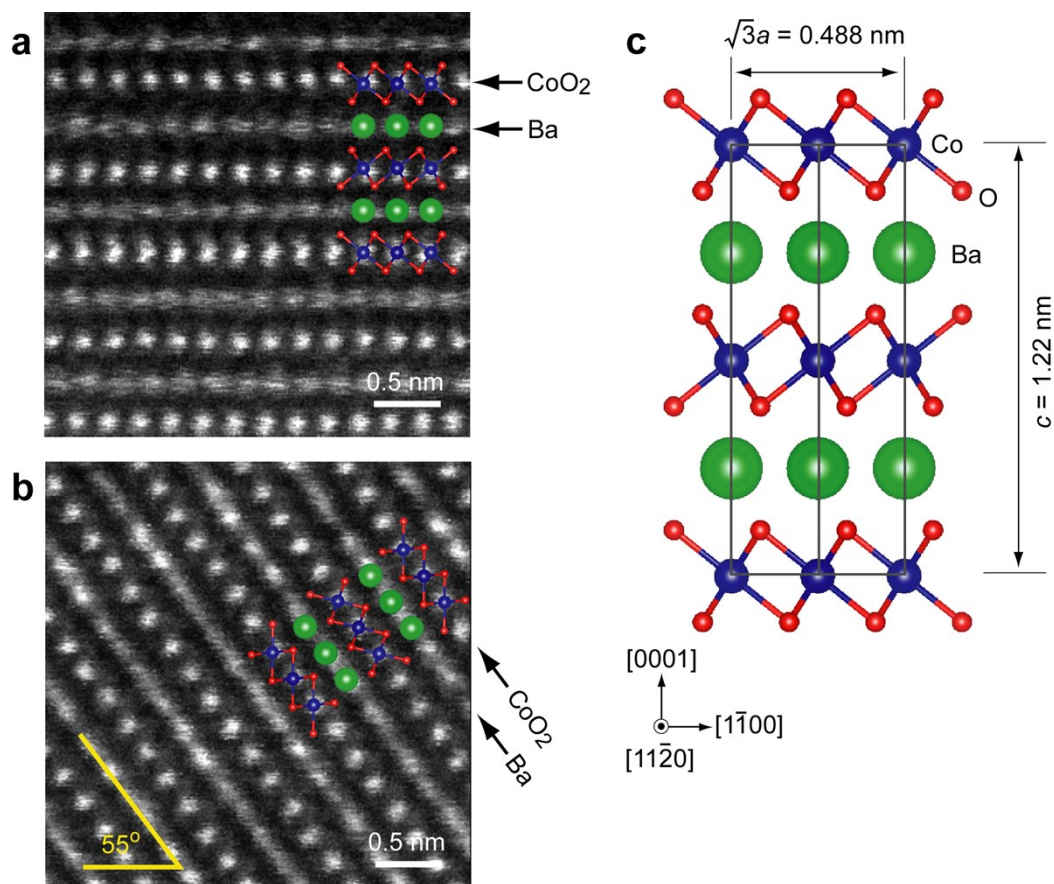

**Figure S5.** The atomic arrangement of the Ba<sub>0.27</sub>CoO<sub>2</sub> films. The magnified HAADF-STEM image of the film grown on (a) (0001)  $\alpha$ -Al<sub>2</sub>O<sub>3</sub> substrate and (b) (1-100)  $\alpha$ -Al<sub>2</sub>O<sub>3</sub> substrate. The schematic crystal structure of Ba<sub>1/3</sub>CoO<sub>2</sub> (c) is superimposed in the STEM images. The Ba and CoO<sub>2</sub> layers are stacked parallel to the (0001) substrate surface whereas Ba and CoO<sub>2</sub> layers are inclined 55° to the (1-100) substrate surface.

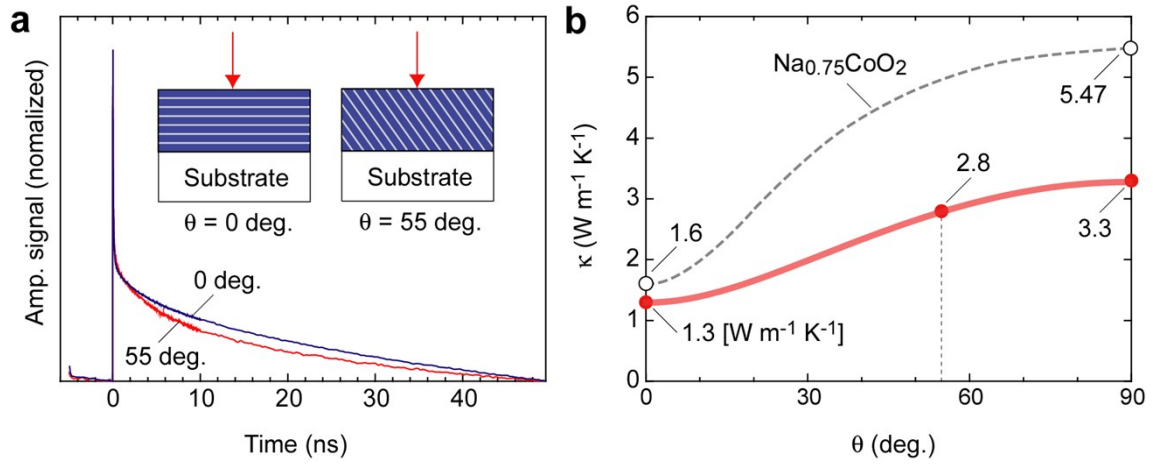

**Figure S6.** Thermal conductivity of the  $\text{Ba}_{0.27}\text{CoO}_2$  epitaxial films at room temperature. (a) Decay curves of TDTR signal. The  $55^\circ$  inclined film shows faster decay. (b) Thermal conductivity of the  $\text{Ba}_{0.27}\text{CoO}_2$  epitaxial films. The observed thermal conductivity of the  $c$ -axis oriented  $\text{Ba}_{0.27}\text{CoO}_2$  epitaxial film ( $\theta = 0^\circ$ ) was  $1.3 \text{ W m}^{-1} \text{ K}^{-1}$  and that of the  $55^\circ$  inclined film was  $2.8 \text{ W m}^{-1} \text{ K}^{-1}$ . The thermal conductivity along the  $\text{CoO}_2$  layer ( $\theta = 90^\circ$ ) was obtained theoretically using these values.
